# Supplementary material
Source: MDPI journal article supplement (https://www.mdpi.com/2304-6732/9/10/782)
Supplement: s1 [file s1]

# **Properties of Compacts from Mixtures of Calcium Fluoride Micro- and Nanopowders**

Vladislav G. Ilves <sup>1,\*</sup>, Sergey Yu. Sokovnin <sup>1,2</sup>, Sergey V. Zayats <sup>1</sup> and Mikhail G. Zuev <sup>3</sup>

<sup>1</sup> Institute of Electrophysics, Ural Branch, Russian Academy of Sciences, 620016 Yekaterinburg, Russia

<sup>2</sup> Institute of Physics and Technology, Ural Federal University Named after the First President of Russia B.N. Yeltsin, 21 Mira Street, 620002 Yekaterinburg, Russia

<sup>3</sup> Institute of Solid State Chemistry, Ural Branch, Russian Academy of Sciences, 620990 Yekaterinburg, Russia

\* Correspondence: ilves@iep.uran.ru

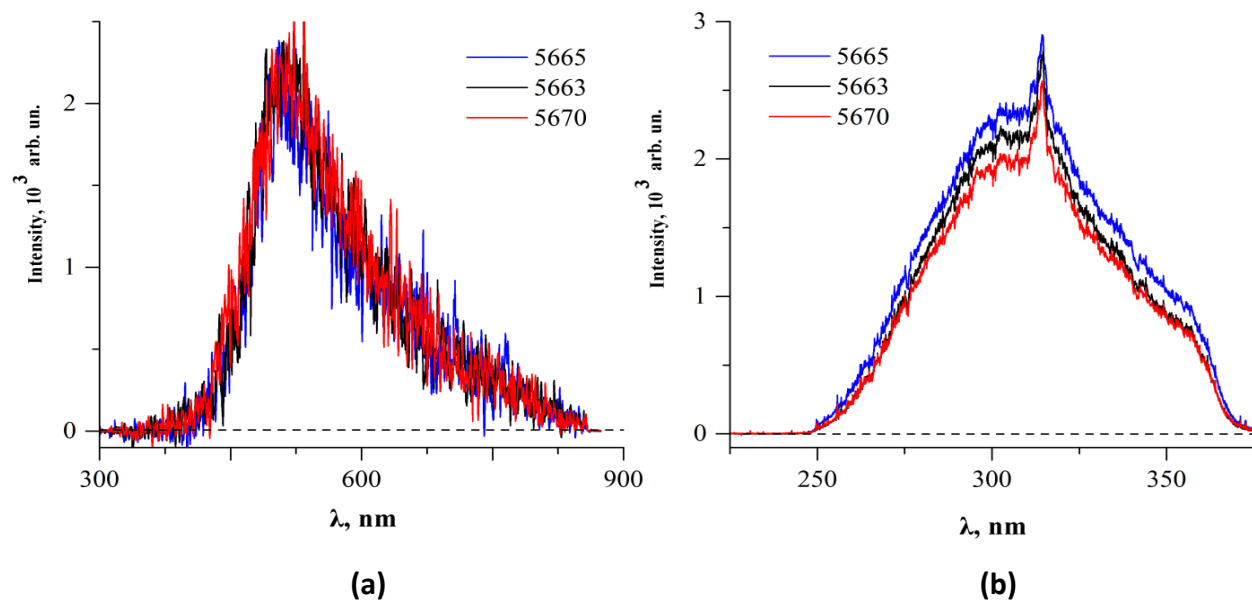

**Figure S1.** PCL spectra of samples of compacts from CaF<sub>2</sub> ( 5663,5665 and 5670) in the visible region of the spectrum **(a)** and in the UV range **(b)**.

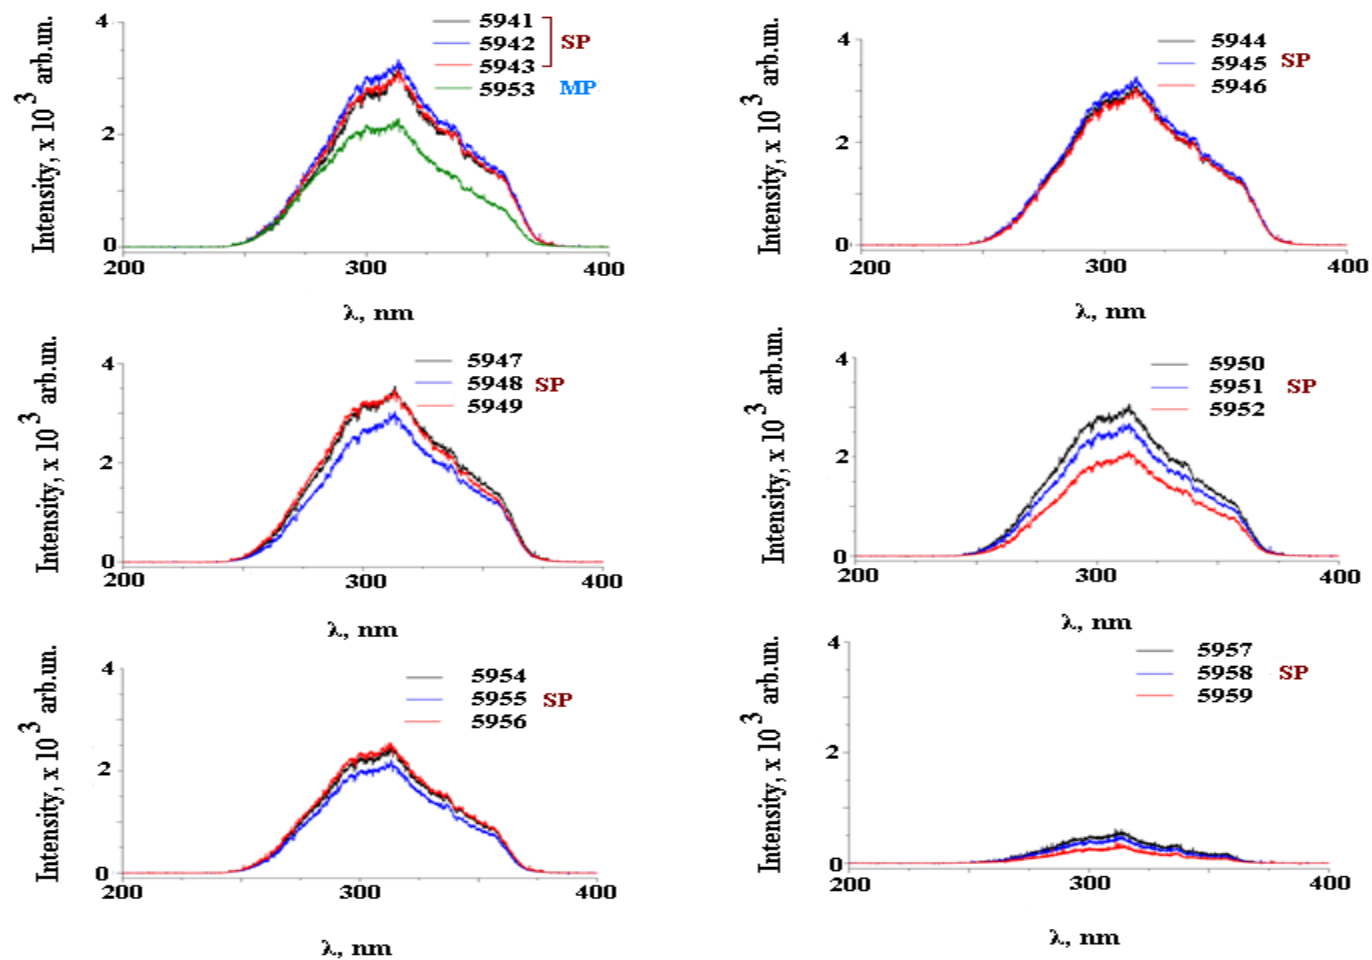

**Figure S2.** PCL spectra of samples of compacts from CaF<sub>2</sub> in the UV range (SP- static pressing, MP- magnetic pulse pressing).
